# Supplementary material
Source: Springer Nature journal article supplement (https://www.springermedizin.de/resource/supplementary/12889_2013_6023_MOESM3_ESM.pdf/9494152)

# Organisation (Department of health and care)

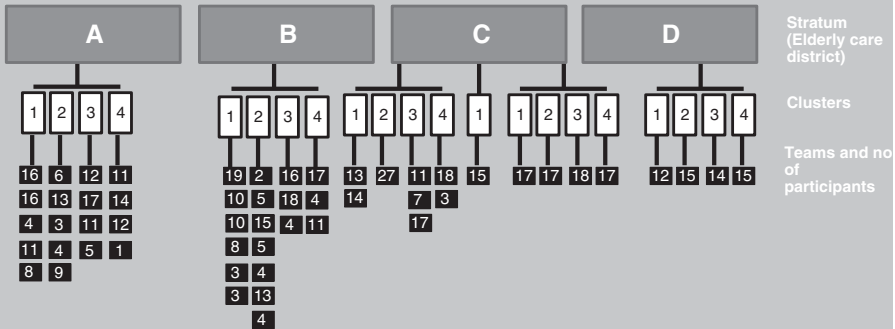

Supplement: MOESM3 [file 9494152]
